# Supplementary material for: Observations of the vertical distributions of summertime atmospheric pollutants in Nam Co: OH production and source analysis
Source: Copernicus journal article supplement (doi:10.5194/acp-24-10093-2024), 2024-09-12
Supplement: Supplementary file 1 [file acp-24-10093-2024-supplement.pdf]

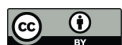

*Supplement of*

## **Observations of the vertical distributions of summertime atmospheric pollutants in Nam Co: OH production and source analysis**

**Chengzhi Xing et al.**

*Correspondence to:* Cheng Liu ([chliu81@ustc.edu.cn](mailto:chliu81@ustc.edu.cn)) and Chunxiang Ye ([c.ye@pku.edu.cn](mailto:c.ye@pku.edu.cn))

The copyright of individual parts of the supplement might differ from the article licence.

## Section S1. Vertical retrieval algorithm for MAX-DOAS observation

The atmospheric vertical profile (aerosol, H<sub>2</sub>O, NO<sub>2</sub>, HONO, and O<sub>3</sub>) retrieval algorithm from MAX-DOAS measurements was developed based on the optimal estimation method and used radiative transfer model as the forward model (Lin et al., 2020; Liu et al., 2022; Ji et al., 2023; Xing et al., 2023). The maximum a posteriori state vector  $x$  is determined by minimizing the following cost function  $\chi^2$ .

$$\chi^2 = (y - F(x, b))^T S_\epsilon^{-1} (y - F(x, b)) + (x - x_a)^T S_a^{-1} (x - x_a)$$

Here,  $F(x, b)$  is the forward model, which describes the measured DSCDs  $y$  as a function of the retrieval state vector  $x$  (i.e., aerosol and trace gas vertical profiles) and the meteorological parameters  $b$  (e.g., atmospheric pressure and temperature profiles);  $x_a$  denotes the a priori vector that serves as an additional constraint;  $S_\epsilon$  and  $S_a$  are the covariance matrices of  $y$  and  $x_a$ , respectively. The retrieval of vertical profiles of aerosols and trace gases were classified into two steps. Firstly, we retrieved vertical aerosol profiles based on a series of retrieved O<sub>4</sub> DSCDs at different elevation angles. Secondly, the retrieved aerosol profiles were utilized as the input parameters to the radiative transfer model to retrieve H<sub>2</sub>O, NO<sub>2</sub> and HONO profiles. Considering the strong O<sub>3</sub> absorption in the stratosphere, the retrieval of the tropospheric O<sub>3</sub> profile must remove the influence of stratospheric O<sub>3</sub>. In this study, daily stratospheric O<sub>3</sub> profiles from TROPOMI measurements were included in the radiative transfer model simulation for tropospheric O<sub>3</sub> profile retrieval to account for the influence of stratospheric O<sub>3</sub> absorption on the retrieval.

## Section S2. WRF model configurations

The Weather Research and Forecasting (WRF) model was used to simulate the planetary boundary layer (PBL) height on the Tibetan Plateau. The detailed description of WRF model was given in the WRF website (<http://www.wrf-model.org/index.php>). In this work, the simulation domain covered 25°N-35°N and 80°E-100°E. The horizontal resolution of this simulation was set to 20×20 km<sup>2</sup>, and we set 26 hybrid pressure-sigma levels in the vertical direction. We selected the 6-h final operational global analysis (FNL) data as the initial meteorological fields and boundary conditions. The data were provided by the National Centers for Environmental Prediction (NCEP) with a 1°×1° spatial resolution. Moreover, the NCEP Administrative Data Processing (ADP) Global Surface Observational Weather Data (ds461.0) and Upper Air Observational Weather Data (ds351.0) with 6-h temporal resolution were used to accurately reproduce the methodology. The physical parameterization schemes adopted in this study were described in Table S1.

Table S1. Model physical parameterization schemes.

| Schemes                  | Description                                           |
|--------------------------|-------------------------------------------------------|
| Microphysics             | Purdue Lin Scheme (Chen et al., 2002)                 |
| Longwave radiation       | Rapid radiative RRTMG Scheme (Iacono et al., 2008)    |
| Shortwave radiation      | RRTMG Scheme (Iacono et al., 2008)                    |
| Cumulus parameterization | Grell-Freitas Ensemble Scheme (Grell et al., 2014)    |
| Land surface             | Unified Noah Land Surface Model (Tewari et al., 2004) |
| Planetary boundary layer | Yonsei University Scheme (Hong et al., 2006)          |

31

32

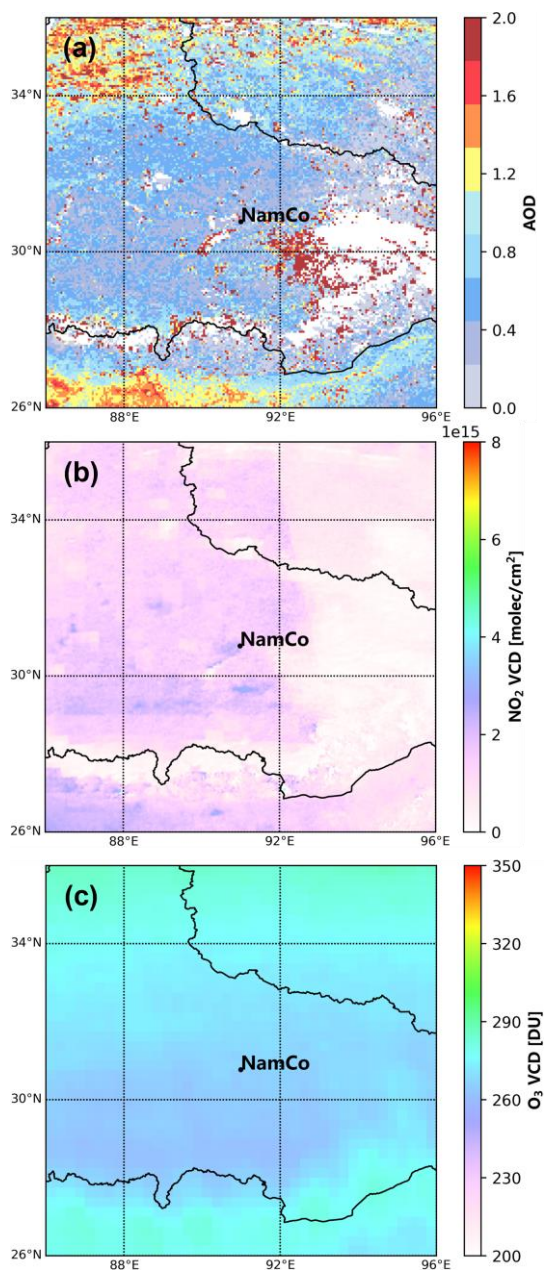

34

35 Figure S1. Averaged spatial distributions of (a) AOD monitored by Himawari-8, (b) NO<sub>2</sub> VCDs  
36 monitored by TROPOMI, (and c) O<sub>3</sub> total VCDs monitored by OMI from May to July 2019 in Nam  
37 Co.

38

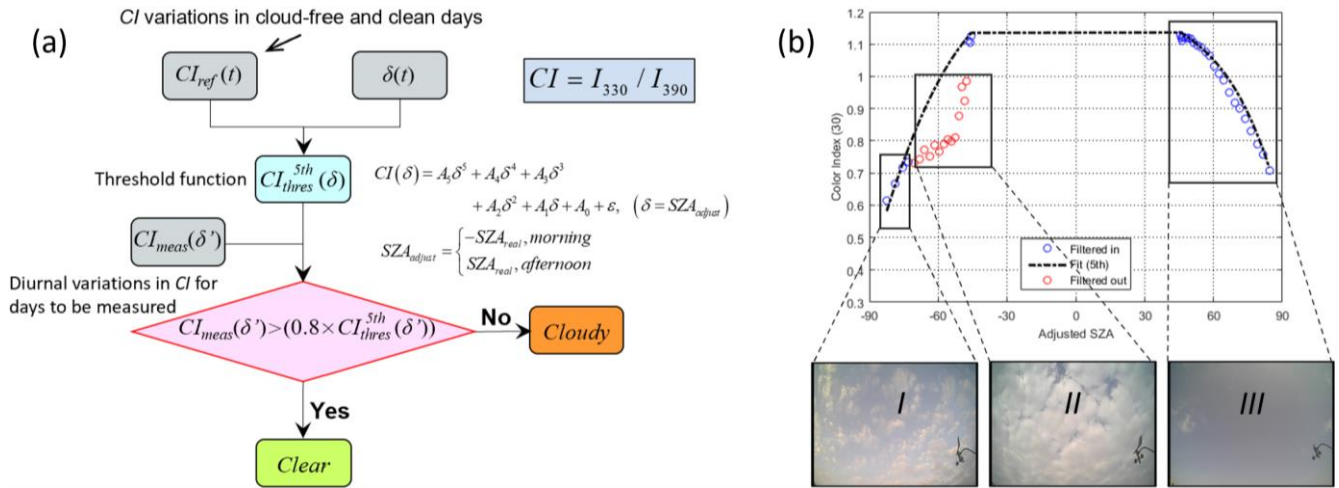

39  
40  
41

Figure S2. (a) Color Index cloud classification algorithm process. (b) Example of cloud classification.

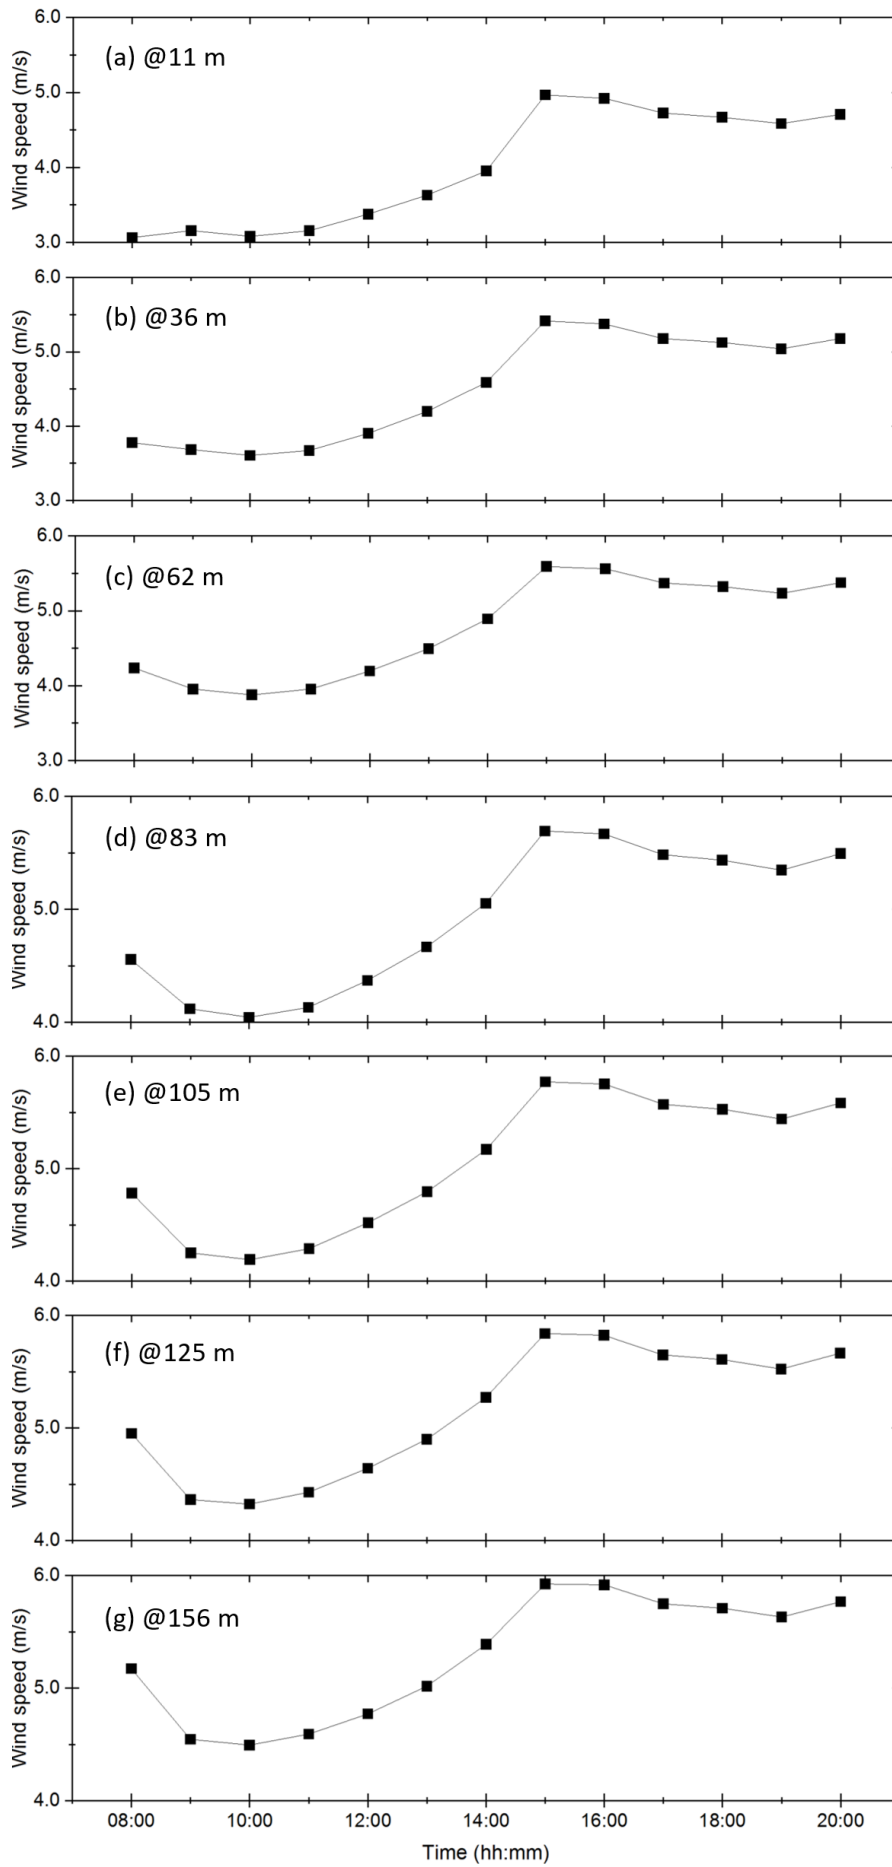

42  
43  
44  
45

Figure S3. Wind speed at seven different height layers at the measurement site during the measurements.

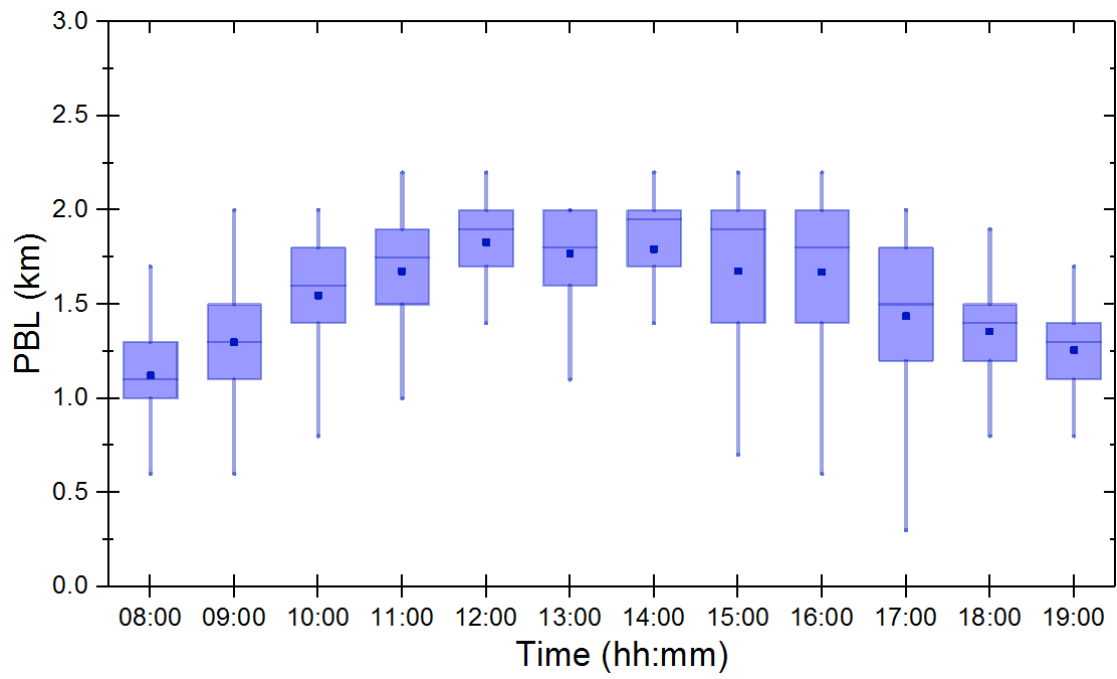

46

47 Figure S4. The diurnal variation of PBL in Nam Co from May to July 2019. The top and bottom of the  
48 box represented 75<sup>th</sup> and 25<sup>th</sup> percentiles, respectively. The lines and dots within the boxes were the  
49 median and mean, respectively.

50

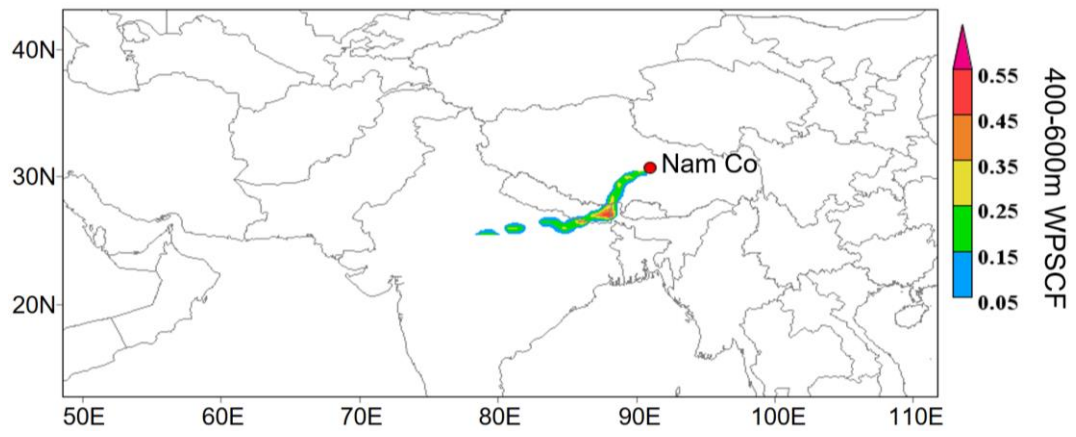

51

52

53

Figure S5. Spatial distribution of WPSCF values for aerosol at 400-600 m layer on 13<sup>th</sup> and 30<sup>th</sup> June.

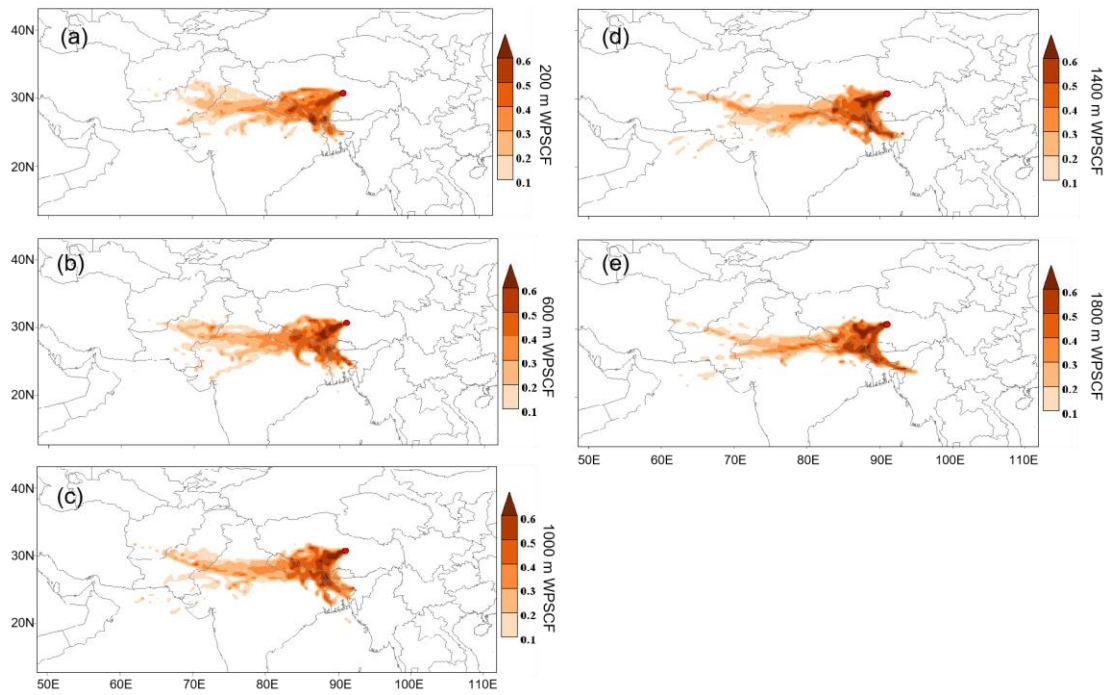

54  
55  
56  
57

Figure S6. Spatial distributions of WPSCF values for H<sub>2</sub>O at (a) 200 m, (b) 600 m, (c) 1000 m, (d) 1400 m, and (e) 1800 m height layers from 01<sup>st</sup> May to 09<sup>th</sup> July 2019 over CAS (NAMORS).



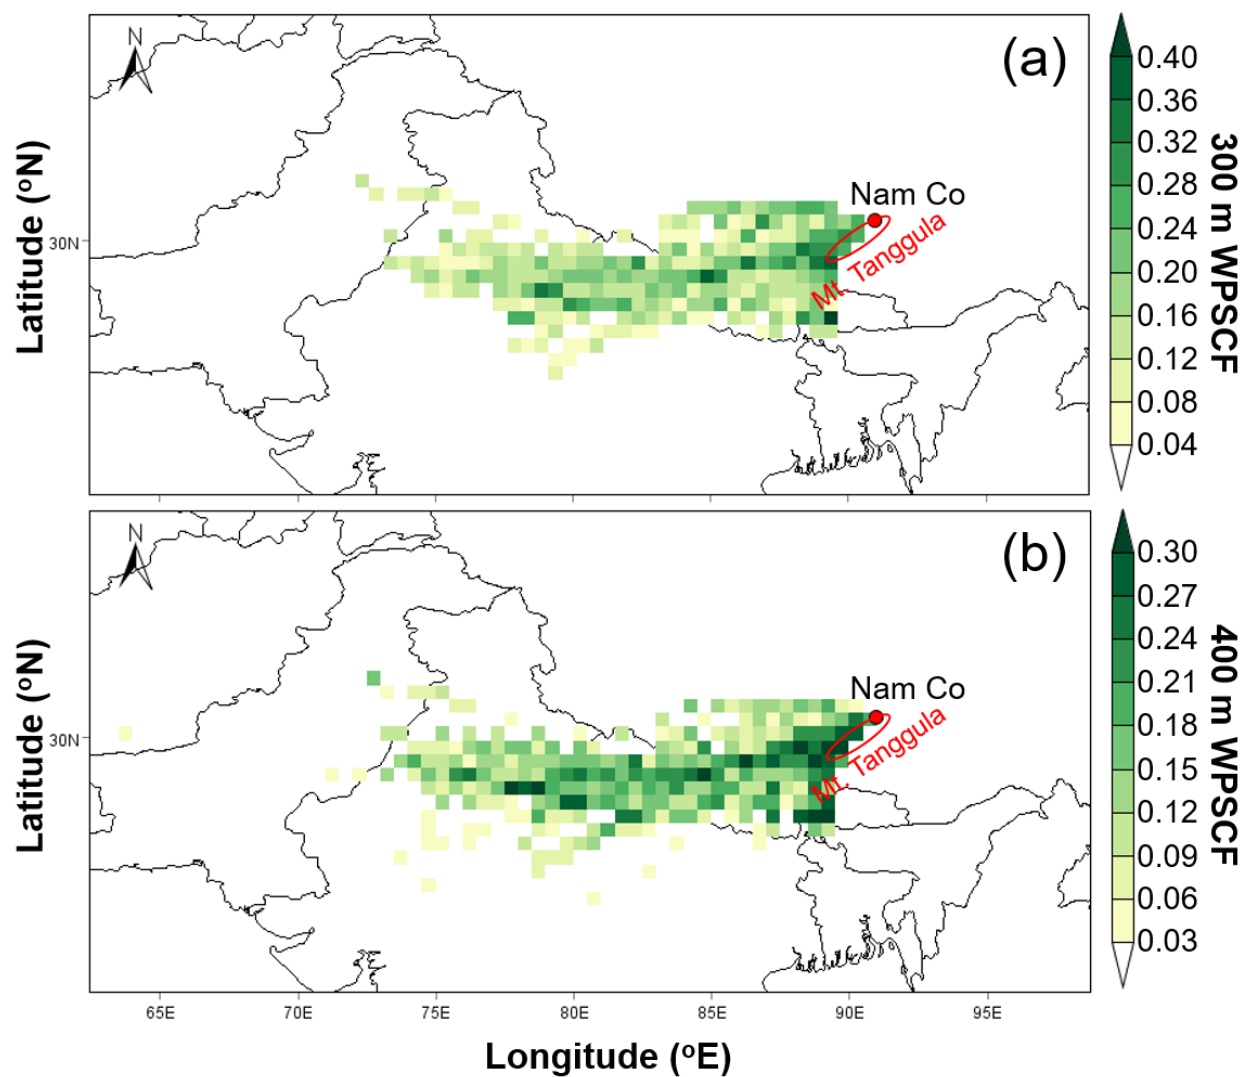

58

59 Figure S7. Spatial distributions of 24-h WPSCF values for NO<sub>2</sub> at (a) 300 m, and (b) 400 m height  
 60 layers from 01 May to 09 July 2019 over CAS (NAMORS).

61

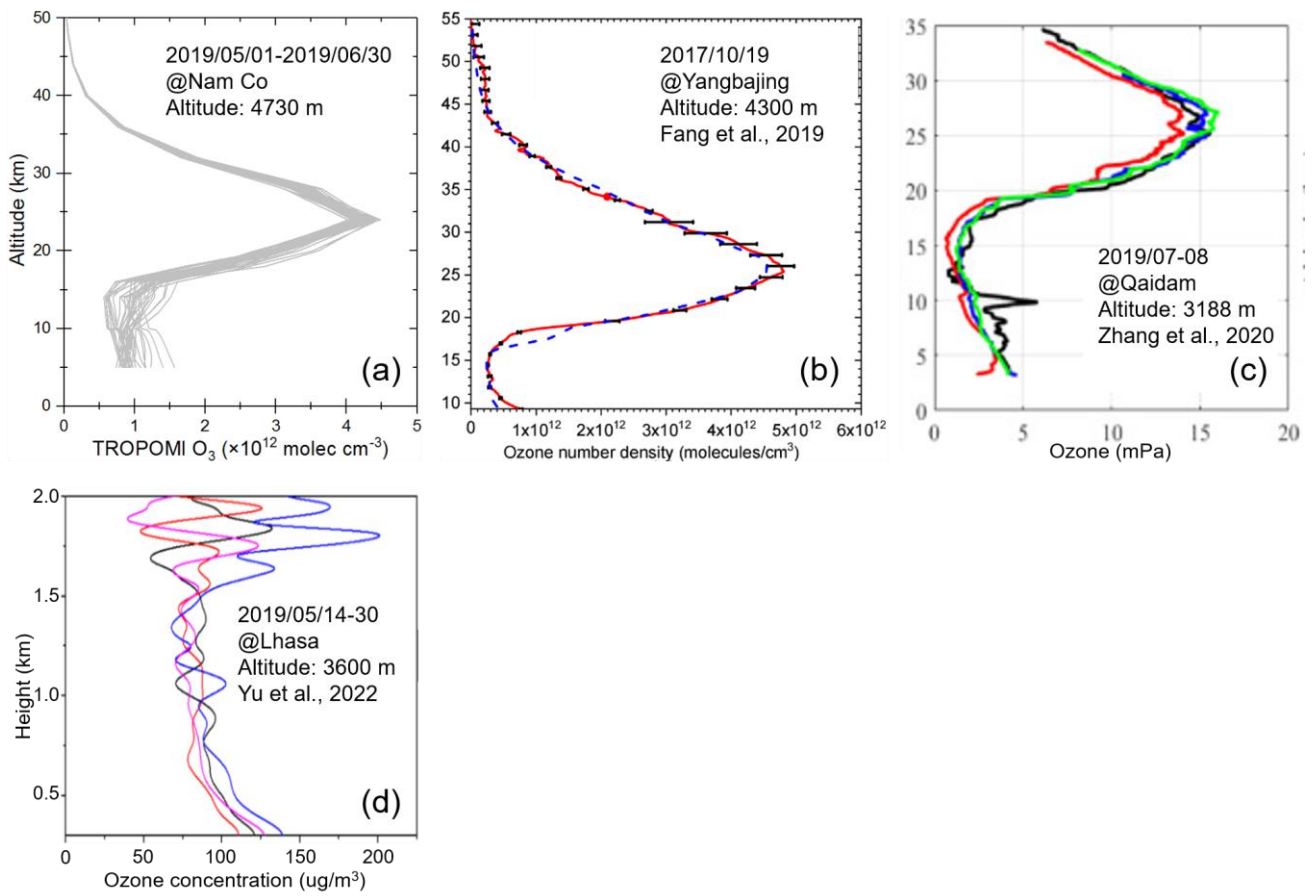

62

63 Figure S8. Ozone vertical profile measure by (a) TROPOMI at Nam Co, (b) lidar at Yangbajing (Feng  
 64 et al., 2019), (c) ozonesonde at Qaidam (Zhang et al., 2020), and (d) lidar at Lhasa (Yu et al., 2022).

65

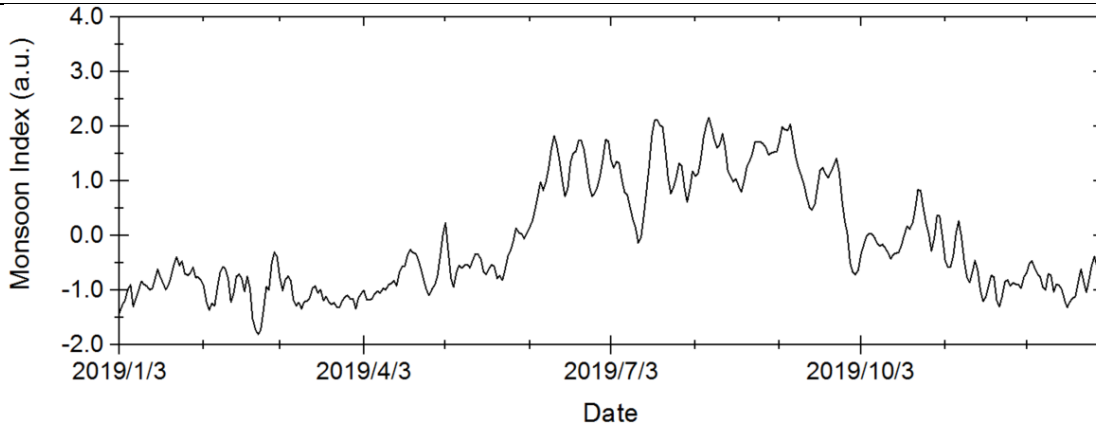

66  
67 Figure S9. The Indian monsoon index during 2019.

68  
69

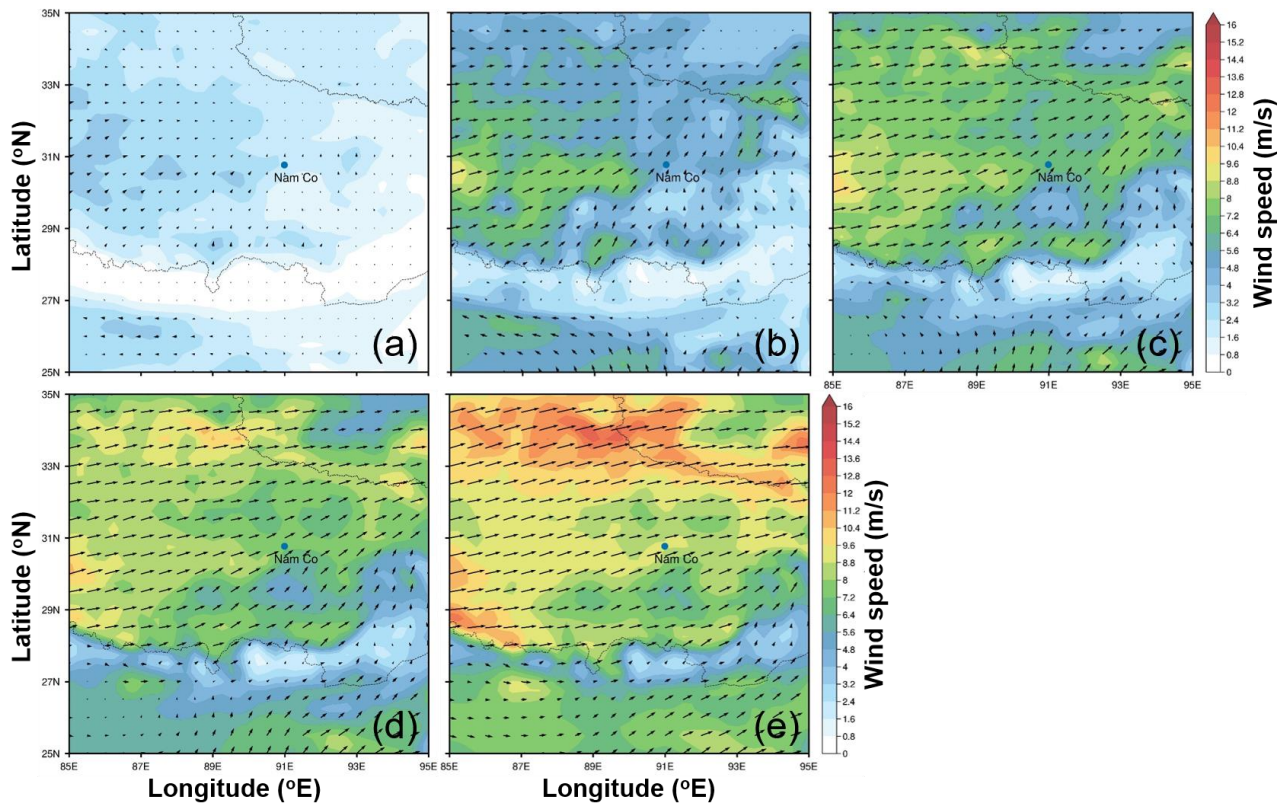

70

71 Figure S10. Wind direction and wind speed at (a) 10 m, (b) 500 m, (c) 1000 m, (d) 1300 m, and (e)  
 72 1800 m at a range of 25°N-35°N and 85°E-95°E, respectively.  
 73

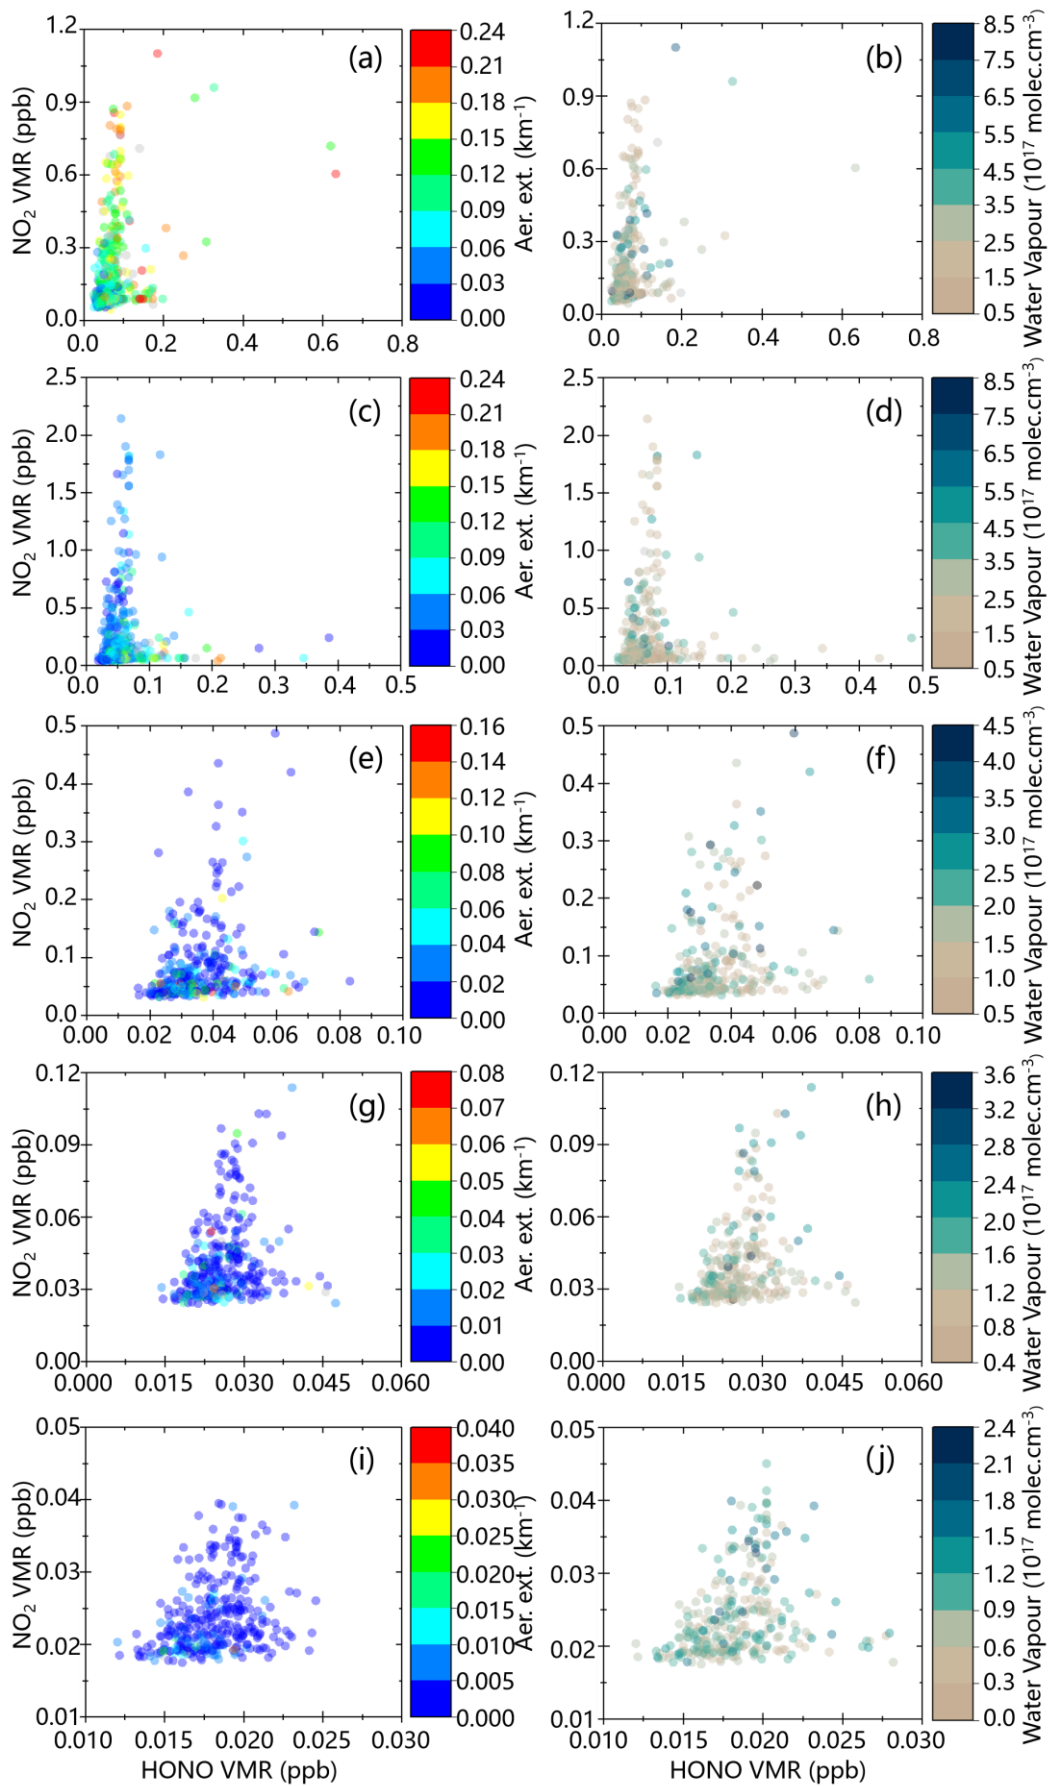

74

75 Figure S11. Scatter plots of HONO vs NO<sub>2</sub> at (a-b) 0-0.2 km, (c-d) 0.4-0.6 km, (e-f) 0.8-1.0 km, (g-h)  
 76 1.2-1.4 km, and (i-j) 1.6-1.8 km coloured by aerosol extinction coefficients and water vapour in the top  
 77 and bottom row, respectively, from 01 May to 09 July 2019.

78



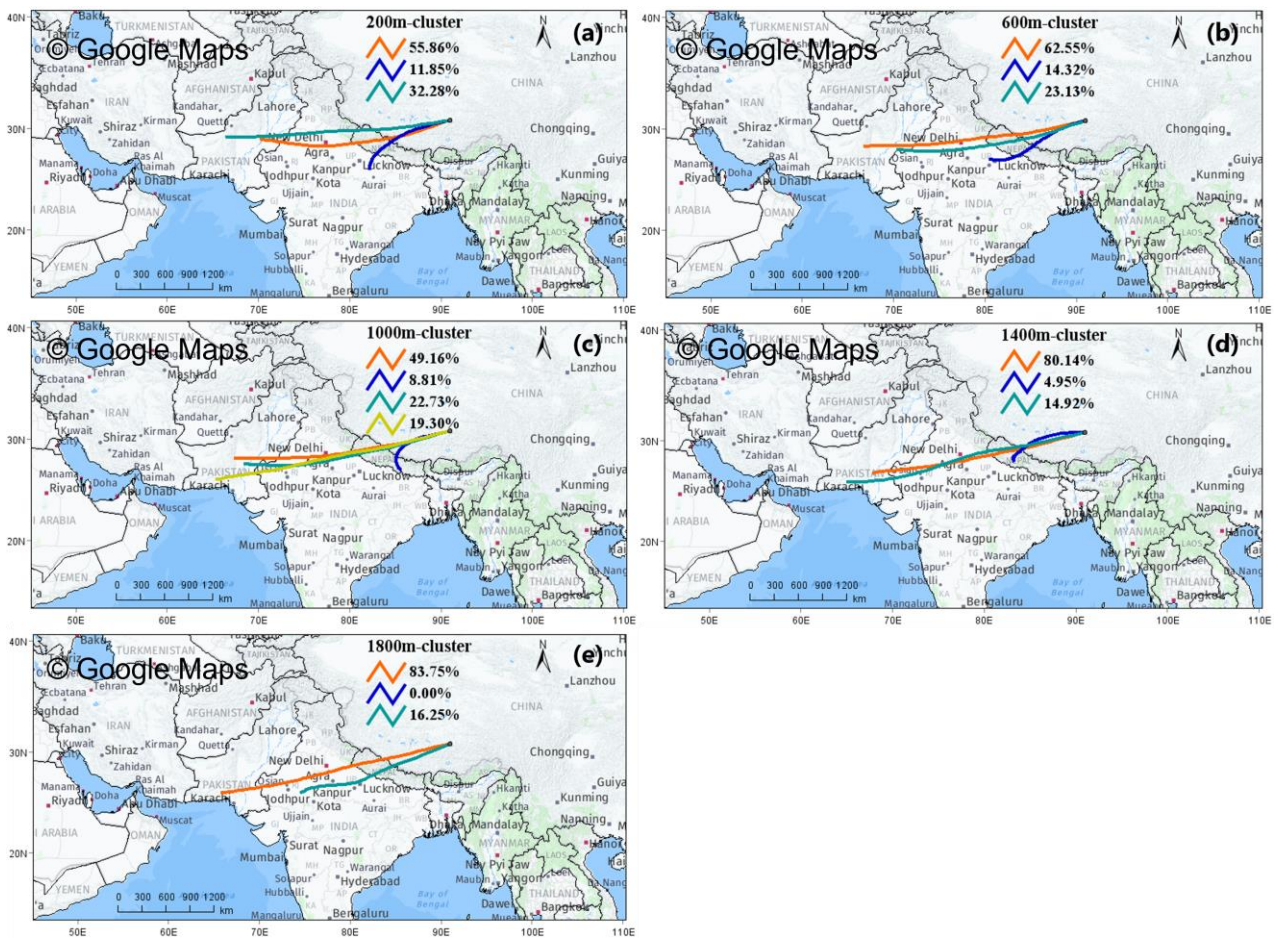

79

80 Figure S12. The percentage of allocation to each mean 48-h backward trajectory cluster arriving at  
 81 CAS (NAMORS) at (a) 200 m, (b) 600 m, (c) 1000 m, (d) 1400 m, and (e) 1800 m height layers from  
 82 01 May to 09 July 2019.

83

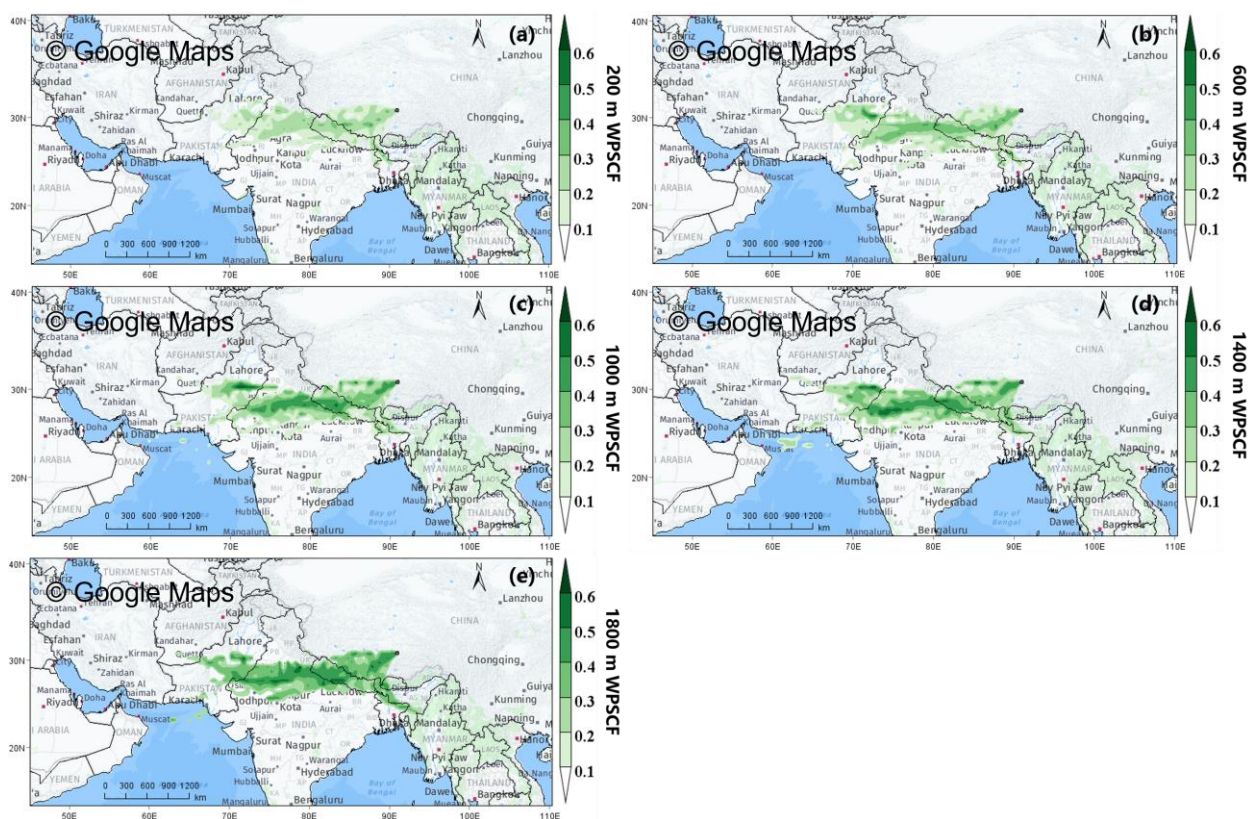

84  
85  
86  
87

Figure S13. Spatial distributions of 48-h WPSCF values for O<sub>3</sub> at (a) 200 m, (b) 600 m, (c) 1000 m, (d) 1400 m, and (e) 1800 m height layers from 01 May to 09 July 2019 over CAS (NAMORS).

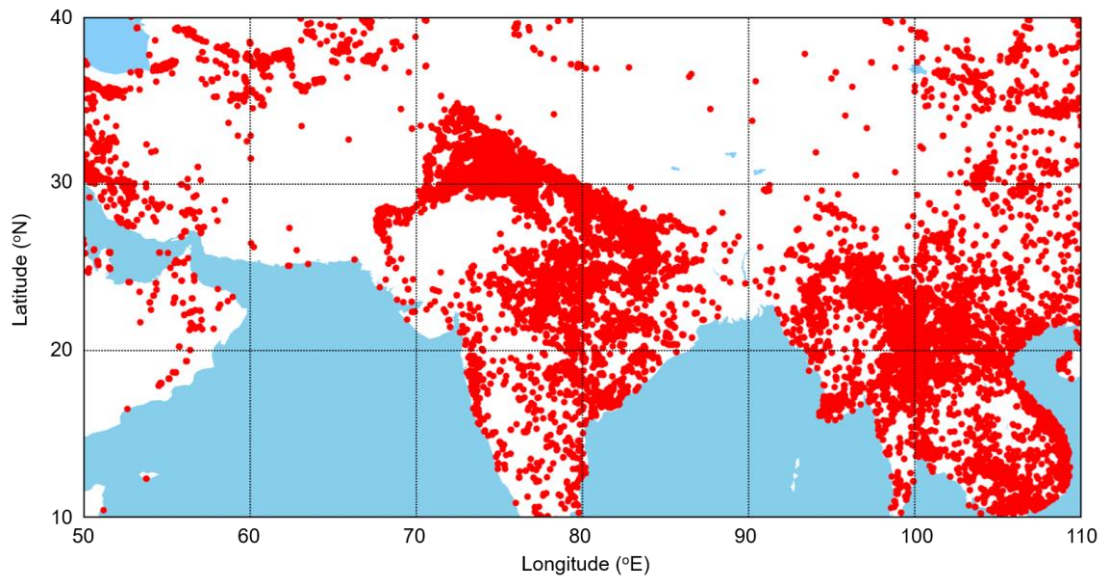

88  
89  
90  
91

Figure S14. The spatial distribution of fire point in south Asian subcontinent from May to July 2019.



---

## 92 **References**

- 93 Fang, X., Li, T., Ban, C., Wu, Z., Li, J., Li, F., Cen, Y., and Tian, B.: A mobile differential absorption  
94 lidar for simultaneous observations of tropospheric and stratospheric ozone over Tibet, *Opt. Express*,  
95 2019, 27(4), 4126-4139, doi:10.1364/OE.27.004126.
- 96 Yu, J., Meng, L., Chen, Y., Zhang, H., and Liu, J.: Ozone profiles, precursors, and vertical distribution  
97 in urban Lhasa, Tibetan Plateau, *Remote Sens.*, 2022, 14(11), doi:10.3390/rs14112533.
- 98 Zhang, J., Xia, X., and Wu, X.: First in situ UV profile across the UTLS accompanied by ozone  
99 measurement over the Tibetan Plateau, *J. Environ. Sci.*, 2020, 98, 71-76, doi:10.1016/j.jes.2020.05.020.
- 100 Iacono, M. J., Delamere, J. S., Mlawer, E. J., Shephard, M. W., Clough, S. A., Collins, W. D.:  
101 Radiative forcing by long-lived greenhouse gases: Calculations with the AER radiative transfer models,  
102 *J. Geophys. Res.*, 2008, 113.
- 103 Grell, G. A., Freitas, A. R.: A scale and aerosol aware stochastic convective parameterization for  
104 weather and air quality modeling, *Atmos. Chem. Phys.*, 2014, 13, 23845-23893.
- 105 Tewari, M., Chen, F., Wang, W., Dudhia, J., LeMone, M. A., Mitchell, K. M., Ek, G., Gayno, J.,  
106 Wegiel, R., Cuenca, H.: Implementation and verification of the unified NOAA land surface model in  
107 the WRF model, *Geoscience*, 2004.
- 108 Hong, S. Y., Yign, N., Jimy, D.: A new vertical diffusion package with an explicit treatment of  
109 entrainment processes, *Mon. Weather Rev.*, 2006, 134, 2318-2341.
- 110 Chen, S. H., Sun, W. Y.: A one-dimensional time dependent cloud model, *J. Meteorol. Soc. Jpn.*, 2002,  
111 80, 99-118.
- 112 Ji, X., Liu, C., Wang, Y., Hu, Q., Lin, H., Zhao, F., Xing, C., Tang, G., Zhang, J., Wagner, T.: Ozone  
113 profiles without blind area retrieved from MAX-DOAS measurements and comprehensive validation  
114 with multi-platform observations. *Remote Sensing of Environment*, 284, 113339,  
115 doi.org/10.1016/j.res.2022.113339, 2023.
- 116 Liu, C., Xing, C., Hu, Q., Li, Q., Liu, H., Hong, Q., Tan, W., Ji, X., Lin, H., Lu, C., Lin, J., Liu, H.,  
117 Wei, S., Chen, J., Yang, K., Wang, S., Liu, T., Chen, Y.: Ground-based hyperspectral stereoscopic  
118 remote sensing network: A promising strategy to learn coordinated control of O<sub>3</sub> and PM<sub>2.5</sub> over China.  
119 *Engineering*, 19, 71-83, doi.org/10.1016/j.eng.2021.02.019, 2022.
- 120 Lin, H., Liu, C., Xing, C., Hu, Q., Hong, Q., Liu, H., Li, Q., Tan, W., Ji, X., Wang, Z., Liu, J.:  
121 Validation of water vapor vertical distributions retrieved from MAX-DOAS over Beijing, China.  
122 *Remote Sensing*, 12, 3193, doi.org/10.3390/rs12193193, 2020.
- 123 Xing, C., Xu, S., Song, Y., Liu, C., Liu, Y., Lu, K., Tan, W., Zhang, C., Hu, Q., Wang, S., Wu, H., Lin,  
124 H.: A new insight into the vertical differences in NO<sub>2</sub> heterogeneous reaction to produce HONO over  
125 inland and marginal seas. *Atmospheric Chemistry and Physics*, 23, 5815-5834,  
126 doi.org/10.5194/acp-23-5815-2023, 2023.
